1 **A novel small molecule LLL12B inhibits STAT3 signaling and sensitizes**  
2 **ovarian cancer cell to paclitaxel and cisplatin**

3

4 Ruijie Zhang<sup>1,2</sup>, Xiaozhi Yang<sup>3</sup>, Dana M. Roque<sup>4</sup>, Chenglong Li<sup>3\*</sup>, Jiayuh Lin<sup>2\*</sup>

5 <sup>1</sup>Department of Thoracic Surgery, Tongji Hospital, Tongji Medical College, Huazhong

6 University of Science and Technology, Wuhan, P.R. China.<sup>2</sup>Department of Biochemistry and

7 Molecular Biology, University of Maryland School of Medicine, Baltimore, MD, USA.

8 <sup>3</sup>Department of Medicinal Chemistry, College of Pharmacy, the University of Florida,

9 Gainesville, FL 32610, USA. <sup>4</sup>Division of Gynecologic Oncology· Department of Obstetrics and  
10 Gynecology, University of Maryland School of Medicine, Baltimore, MD, USA.

11

12 **Running title:** A novel small molecule targets STAT3 in ovarian cancer cells

13

14 **\*Corresponding authors:**

15 Emails: Chenglong Li: [lic@cop.ufl.edu](mailto:lic@cop.ufl.edu)

16 Jiayuh Lin: [JLin@som.umaryland.edu](mailto:JLin@som.umaryland.edu)

17

18

19 **Keywords**

20 Small molecule inhibitors; STAT3; ovarian cancer; paclitaxel; cisplatin

21

22

23

25 **Abstract**

26 Ovarian cancer is the fifth most common cause of cancer deaths among American women. Platinum and  
27 taxane combination chemotherapy represents the first-line approach for ovarian cancer, but treatment  
28 success is often limited by chemoresistance. Therefore, it is necessary to find new drugs to sensitize  
29 ovarian cancer cells to chemotherapy. Persistent activation of Signal Transducer and Activator of  
30 Transcription 3 (STAT3) signaling plays an important role in oncogenesis. Using a novel approach called  
31 advanced multiple ligand simultaneous docking (AMLSD), we developed a novel nonpeptide small  
32 molecule, LLL12B, which targets the STAT3 pathway. In this study, LLL12B inhibited STAT3  
33 phosphorylation (tyrosine 705) and the expression of its downstream targets, which are associated with  
34 cancer cell proliferation and survival. We showed that LLL12B also inhibits cell viability, migration, and  
35 proliferation in human ovarian cancer cells. LLL12B combined with either paclitaxel or with cisplatin  
36 demonstrated synergistic inhibitory effects relative to monotherapy in inhibiting cell viability and  
37 LLL12B-paclitaxel or LLL12B-cisplatin combination exhibited greater inhibitory effects than cisplatin-  
38 paclitaxel combination in ovarian cancer cells. Furthermore, LLL12B-paclitaxel or LLL12B-cisplatin  
39 combination showed more significant in inhibiting cell migration and growth than monotherapy in  
40 ovarian cancer cells. In summary, our results support the novel small molecule LLL12B as a potent  
41 STAT3 inhibitor in human ovarian cancer cells and suggest that LLL12B in combination with the current  
42 front-line chemotherapeutic drugs cisplatin and paclitaxel may represent a promising approach for ovarian  
43 cancer therapy.

44

45

46

47

48

49

## 50 **Introduction**

51 Ovarian cancer is the most lethal gynecologic malignancy [1-2]. In 2018, there were  
52 approximately 22,240 new cases and 14,070 deaths from ovarian cancer in the United States [3].  
53 Because of a lack of early symptoms, nearly 80% of patients will be diagnosed at an advanced  
54 stage [4]. Adjuvant chemotherapy is usually needed following surgical cytoreduction. Platinum  
55 in combination with taxane chemotherapy is considered a first-line approach [5-7].  
56 Unfortunately, five-year survival rates have not improved much during the past 20 years [8-11],  
57 due to both intrinsic and acquired chemoresistance. Many research efforts focus upon reversal of  
58 chemotherapy resistance for recurrent disease, but less attention is given to enhancing sensitivity  
59 to chemotherapy during the primary treatment of ovarian cancer [12-15].

60 In recent years, many researchers have invested in biotherapies with more precise targets,  
61 including immunotherapy, gene therapy, and molecular targeted therapy, which may be more  
62 effective and less toxic [16]. As the most common member of the signal transducers and  
63 activators of transcription (STAT) proteins, STAT3 is critical to many signaling pathways [17].  
64 In normal cells, the activation of STAT3 is transitory and restricted; it can promote embryo  
65 development and growth, induce inflammation, and cause autophagy, among other processes  
66 [18]. STAT3 also plays an important role in the development of tumors, and is now considered  
67 an oncogene. The constitutive and abnormal activation of STAT3 can upregulate or  
68 downregulate many target tumor-related genes, such as *BCL-2*, *c-myc*, *cyclinD1*, *survivin*,  
69 *cleaved caspase-3*, *HIF-1* and *VEGF*, which then enable various processes key to malignant  
70 progression, such as cell proliferation, tumor initiation, migration, invasion, angiogenesis,  
71 metastasis, cell cycle dysregulation, induction of the epithelial mesenchymal transition (EMT),  
72 and inhibition of apoptosis, as well as promote multidrug resistance to chemotherapy [18].

73 STAT3 activation occurs when the tyrosine 705 (Tyr705) residue is phosphorylated. Using a  
74 novel approach called advanced multiple ligand simultaneous docking (AMLSD), we developed  
75 several new small molecular inhibitors targeting STAT3, including the novel STAT3 inhibitor  
76 LLL12B. Computer models with docking simulation showed that LLL12B binds directly to the  
77 phosphoryl tyrosine 705(pTyr705) binding site of the STAT3 monomer. In the present study, we  
78 characterized the biologic effects of LLL12B alone and in combination with chemotherapy on  
79 ovarian cancer cells.

80

81

82

83

84

85

86

87

88

89

90

91

92

93

94

95

## 96 **Material and Methods**

### 97 **Materials**

98 The small molecule LLL12B, a novel STAT3 inhibitor, was synthesized at University of Florida  
99 College of Pharmacy (Chenglong Li). LLL12B powder was dissolved in sterile dimethyl  
100 sulfoxide (DMSO) to make a 20 mM stock solution and stored at -20 °C. Cisplatin and 3-(4, 5-  
101 dimethylthiazol-2-yl)-2, 5-diphenyltetrazolium bromide (MTT) were purchased from Sigma  
102 (Burlington, MA). The stock concentration of cisplatin was 5mM in ddH<sub>2</sub>O. Paclitaxel was  
103 obtained from LC Laboratories (Woburn, MA). The stock concentration of paclitaxel was 20mM  
104 in DMSO. Primary and secondary antibodies were bought from Cell Signaling Technology  
105 (Danvers, MA).

### 106 **Cell Lines**

107 All four human ovarian cancer cell lines (A2780, SKOV3, CAOV3, and OVCAR5), were  
108 purchased from ATCC (American Type Culture Collection, Manassas, VA). OVAR5 was  
109 cultured in RPMI1640 medium with 10% fetal bovine serum (FBS) and 1%  
110 penicillin/streptomycin (PS); A2780, CAOV3, and SKOV3 were cultured in Dulbecco's  
111 modified Eagle medium (DMEM) with 10% FBS and 1% PS. All of the cell lines were  
112 maintained in a humidified 37°C incubator with 5% CO<sub>2</sub>/95% air. Media were replaced twice a  
113 week.

### 114 **Western blot analysis**

115 The four cell lines were seeded in 10cm-plates in 70% cell density, then treated with DMSO or  
116 different concentrations of LLL12B. Cells were cultured overnight before they were harvested  
117 for Western blot analysis. Ovarian cancer cells were lysed in cold lysis buffer and the proteins  
118 were separated by 10% SDS-PAGE. Proteins were transferred to PVDF membrane under 350mA

119 for 110 minutes and then blocked by 5% milk for 1 hour and incubated overnight at 4°C with  
120 antibodies: anti p-STAT3 (Tyrosine 705), GAPDH, c-MYC, cyclinD1, survivin, and cleaved  
121 caspase 3 . After washing with tris-buffered saline-tween (TBST) for 3 times (15 min), the  
122 membranes were blotted with the secondary antibody and scanned with a Storm Scanner  
123 (Amersham Pharmacia Biotech Inc, Piscataway, NJ).

#### 124 **MTT cell viability assay**

125 We seeded A2780, SKOV3, CAOV3 and OVCAR5 in 96-well microtiter plates at a density of  
126 3,000 cells with 100µl medium per well. After overnight incubation, the cells were treated in  
127 each well at 37°C with vehicle control (DMSO) or different concentrations of drugs: LLL12B,  
128 cisplatin alone, paclitaxel alone, or their combination. Seventy-two hours later, we added 20µl  
129 of MTT to each well. After incubation for 4 h at 37°C, each well was supplemented with 150µl  
130 of dimethylformamide solubilization solution followed by an incubation overnight, protected  
131 from light at room temperature. Cell viability was assessed using the absorbance at 595 nm of  
132 each well. The DMSO cells were set at 100% and the cell viability of drug-treated cells was  
133 determined relative to DMSO cells. Then the combination index (CI) was determined by  
134 CompuSyn software ([www.combosyn.com](http://www.combosyn.com)). The CI values indicate an additive effect when  
135 equal to 1, an antagonistic effect when >1, and a synergistic effect when <1 based on the theorem  
136 of Chou and Talalay [19].

#### 137 **Wound-healing/cell migration assay**

138 A2780 and SKOV3 cells were seeded in 6-well plates and incubated at 37°C overnight. When  
139 cells reached 100% confluence, the monolayer was scratched by a 100-µl pipette tip. We washed  
140 each well with PBS twice and added new medium with different drugs: DMSO, LLL12B,  
141 paclitaxel, cisplatin or their combination. Photos of each well were captured by microscope at

142 time zero. Cells were incubated at 37°C until the wound of the control well was healed (SKOV3,  
143 18h; A2780, 56h). The photos of each well were captured by microscope again after washing in  
144 PBS twice. Inhibition of migration was measured by ImageJ software (<http://rsb.info.nih.gov/ij/>)  
145 and calculated by the formula: percent of wound healed =  $100 - [(final\ area / initial\ area) \times$   
146  $100\%]$  [20].

#### 147 **Cell growth assay**

148 All four cell lines were seeded in 12-well plates at the same cell density, which was dependent  
149 on the growth ability of each cell line (SKOV3:  $1 \times 10^4$  cells per well, CAOV3:  $2.5 \times 10^4$  cells per  
150 well, A2780:  $0.5 \times 10^4$  cells per well, and OVCAR5:  $1 \times 10^4$  cells per well). The cells were cultured  
151 overnight at 37°C, then were treated with DMSO or different concentrations of drugs: LLL12B,  
152 paclitaxel alone, cisplatin alone, or the combination. We counted the cell number of each well  
153 days 2, 4, and 6 after treatment to generate growth curves. Significant differences were defined  
154 as \*\* $p < 0.01$  and \*\*\*\* $p < 0.0001$ .

#### 155 **Statistical analysis**

156 Significance of correlations was determined by GraphPad Prism 7 software (GraphPad Software  
157 Inc., San Diego, CA, USA). The data were expressed as mean  $\pm$  standard deviations (SD). One-  
158 way ANOVA and two-way ANOVA with Tukey's Test were used to analyze the statistical  
159 difference between two groups. Significance was set at  $p < 0.05$ . The \*, \*\* and \*\*\*  
160 indicate  $p < 0.05$ ,  $p < 0.01$  and  $p < 0.001$ , respectively.

161

162

163

164

165 **Results**

166 **LLL12B inhibited STAT3 phosphorylation and the expression of downstream targeted**  
167 **genes.**

168 To target STAT3, we used a novel approach called advanced multiple ligand simultaneous docking  
169 (AMLSD), and developed a novel nonpeptide small molecule, LLL12B. The chemical structure of  
170 LLL12B is shown (Figure 1). In order to examine the ability of LLL12B to inhibit p-STAT3  
171 (Tyr705) *in vitro*, Western blotting analysis was performed by us. All four ovarian cancer cell  
172 lines were seeded in 10 cm plates and were treated with DMSO or different concentrations of  
173 LLL12B (0.25uM-2.5uM). Protein expression levels were analyzed. Compared with those  
174 treated by DMSO, p-STAT3 was inhibited by LLL12B (Figure 2). In addition, the STAT3  
175 downstream targets c-myc, cyclinD1, and survivin were down-regulated and cleaved caspase-3  
176 was induced (Figure 1). LLL12B inhibited STAT3 phosphorylation and down-regulated  
177 downstream target genes which are associated with cancer cell proliferation and growth [21-24].  
178 These results indicate that LLL12B is a biologically relevant potent STAT3 inhibitor of ovarian  
179 cancer cells.

180 **LLL12B inhibited cell viability of human ovarian cancer cells and synergistically enhanced**  
181 **the effect of cisplatin and paclitaxel.**

182 To evaluate inhibition of cell viability, MTT assays were performed using A2780, CAOV3,  
183 SKOV3 and OVCAR5 cells. Cells were seeded in 96-well plates and treated with LLL12B or  
184 DMSO control followed by culture at 37°C for additional 72 hours. Cell viability was  
185 significantly inhibited by LLL12B (Figure 3). To investigate whether chemotherapy can be  
186 enhanced by LLL12B, the cells were treated by LLL12B combined with cisplatin or paclitaxel.  
187 The combination index (CI) showed that the suppression achieved with combination treatment  
188 was more significant than that of any monotherapy. The CIs of LLL12B combined with cisplatin



189 or paclitaxel in each cell line were all less than 1, which indicated synergism. Furthermore, the  
190 combination of LLL12B with cisplatin or paclitaxel exhibited more significant inhibitory effects  
191 on cell viability than the combination of cisplatin and paclitaxel (Figure 3). These results indicate  
192 that LLL12B inhibits cell viability and also synergistically enhances the effect of chemotherapy  
193 in ovarian cancer cell lines.

194 **LLL12B inhibited cell migration of ovarian cancer cells and enhanced the effect of cisplatin**  
195 **and paclitaxel.**

196 Cell migration is an important step in tumor invasion and metastasis, which confers prognosis.  
197 According to previous literature reports [43], cancer cell migration can be inhibited by blocking  
198 of STAT3 pathway. Therefore, we tested the effects of the novel STAT3 inhibitor LLL12B on  
199 ovarian cancer cell migration and whether the effect of cisplatin and paclitaxel can be enhanced  
200 by LLL12B. Only A2780 and SKOV3 cell lines were tested because the monolayer phenotypes  
201 of the other two cell lines were not suitable for cell migration assays. Compared with the DMSO  
202 control, cell migration was inhibited by LLL12B. The combination of LLL12B with cisplatin or  
203 paclitaxel resulted in more significant inhibition of cell migration compared to monotherapy;  
204 notably, the inhibitory effects exceeded that of paclitaxel and cisplatin in combination (Figure 4).  
205 These results indicate that LLL12B can inhibit cell migration of ovarian cancer cells, and may  
206 also enhance the effects of chemotherapy. This suggests that LLL12B may be helpful for  
207 treatment or prevention of ovarian cancer cell invasion and metastasis.

208 **LLL12B inhibited cell growth and enhanced the effect of cisplatin and paclitaxel.**

209 Since LLL12B synergistically inhibited cell viability of ovarian cancer cells treated with  
210 cisplatin and paclitaxel, we then sought to investigate whether LLL12B could also inhibit cell  
211 growth using standard growth curves. Our results showed that LLL12B inhibited cell growth in

212 all four ovarian cancer lines (Figure 5,Figure 6). Parallel to our observations for viability,  
213 combination treatment of LLL12B with cisplatin or paclitaxel resulted in greater inhibitory  
214 effects on cell growth than monotherapy (Figure 5,Figure 6).

215

## 216 **Discussion**

217 Ovarian cancer is the tenth most common cancer and the fifth most lethal cancer of women in the  
218 United States [1-2]. Among gynecologic malignancies, ovarian cancer has the highest mortality  
219 rate. Ovarian cancer is very difficult to diagnose early, and more than 50% of patients are  
220 diagnosed with advanced (stage III/IV) disease [1-3]. The standard treatment for advanced  
221 ovarian cancer is radical resection combined with platinum-taxane combination chemotherapy  
222 [4, 26-27]. Despite small improvements in 5-year overall survival for this disease, there are still  
223 many challenges for its treatment. The 5-year overall survival of advanced-stage ovarian cancer  
224 is no more than 20–35%, and has not changed much for nearly twenty years. Both intrinsic and  
225 acquired chemoresistance remain problematic, and as many as 75% of ovarian cancer patients  
226 suffer from cancer recurrence [3]. It is therefore crucial to find new drugs to enhance the effect  
227 of current chemotherapy treatment. Targeted therapy often offers the benefit of precise action  
228 and fewer side effects.

229 As an important transducer of many cytokines and growth factors, STAT proteins have 7  
230 members (STAT1, STAT2, STAT3, STAT4, STAT5A, STAT5B and STAT6), and STAT3 is the  
231 most widely known and researched [28]. Compared with normal tissues, STAT3 is  
232 overexpressed or constitutively activated in about 70% of human solid tumors and in 94% of  
233 ovarian cancers [19,29-31]. . A homodimer is formed when STAT3 is activated by  
234 phosphorylation.,which translocates to the nucleus,recognizes and binds to STAT3-specific  
235 DNA-binding elements.Then some target genes can be regulated to promote cell growth,prevent  
236 apoptosis and so on.[17,32-34]. Abnormal activation of STAT3 can induce malignant cell  
237 transformation and is related to the poor prognosis of certain tumors. Conversely, the disruption  
238 of constitutively activated STAT3 can promote cell apoptosis and suppress tumor-cell growth .

239 At the same time, it is reported that over expression of STAT3 also associated with cisplatin  
240 resistance and paclitaxel resistance [17,35-37]. We have previously demonstrated that  
241 constitutive activation of STAT3 was present in ovarian cancer cell lines but not in normal  
242 ovarian surface epithelial cells [38], making selective STAT3 inhibition an excellent candidate  
243 for ovarian cancer treatment. In this study, we provide evidence that STAT3 inhibition may be a  
244 good enhancer for cisplatin and paclitaxel chemotherapy.

245 The SH2 domain is a critical module among the six structural domains of STAT3, which  
246 facilitate binding to specific p-Tyrosine (Tyr) motifs of receptors for activation of the protein.  
247 Interaction of the pTyr-SH2 domain with STAT3 dimerization represents an important molecular  
248 event for STAT3 functioning. For these reasons, most drugs have been designed to bind this  
249 domain. Many peptide-based inhibitors of STAT3 have been reported, but their use is limited by  
250 poor cell permeability and limited *in vivo* stability [39-40]. During recent years, many  
251 nonpeptide small molecule inhibitors have been developed, which show better stability [41-42].

252 We previously developed several nonpeptide small molecule STAT3 inhibitors, such as LLL12,  
253 which inhibits STAT3 phosphorylation and suppresses the development of cancer [43-46]. In  
254 the present study, we explored LLL12B, a carbamate-based prodrug for LLL12. LLL12B has  
255 one of the smallest molecular weights (374 dalton) compared to other STAT3 inhibitors. In  
256 addition, our *in vivo* pharmacokinetic studies in rats (data not shown) indicated that LLL12B is  
257 orally bioavailable (38.0%) and stable in the plasma, producing drug levels 5-fold better  
258 compared to LLL12. These results support that LLL12B is a superior drug relative to LLL12 to  
259 target STAT3 in ovarian cancer cells.

260 In this study, we tested LLL12B in several well-characterized human ovarian cancer cell lines.  
261 LLL12B consistently inhibited STAT3 phosphorylation and downregulated the downstream

262 targets. LLL12B exerted potent inhibition of cell viability, migration and growth. When cisplatin  
263 or paclitaxel was combined with LLL12B, inhibition of these parameters was enhanced relative  
264 to monotherapy and, importantly, greater than that of paclitaxel with cisplatin, which currently  
265 represents the standard of care.

266 In conclusion, the novel small molecule STAT3 inhibitor, LLL12B, designed by AMLSD  
267 methodology shows excellent therapeutic potential in ovarian cancer cell lines. Our results  
268 suggest that LLL12B is a potent STAT3 inhibitor in ovarian cancer, and that LLL12B in  
269 combination with the current front-line chemotherapeutic drugs cisplatin and paclitaxel may  
270 represent a promising approach for ovarian cancer therapy that warrants further study.

271

272

273 **Acknowledgements**

274 We thank Dr. Richard Eckert at the Department of Biochemistry and Molecular Biology at the  
275 University of Maryland (Baltimore, MD, USA) for providing the microscope used to evaluate  
276 the wound healing assay.

277

278 **Funding**

279 This research was supported by the University of Maryland School of Medicine and Greenebaum  
280 Comprehensive Cancer Center start up fund.

281

282 **Competing interests**

283 The authors declare no conflict of interest.

284

285

286

287

288

289

290

291

292

293

294

295

296 **References**

- 297 [1] Morgan RJ Jr, Alvarez RD, Armstrong DK et al (2013) Ovarian cancer, version 2.2013. J  
298 Natl Compr Canc Netw 11(10):1199–1209.
- 299 [2] Salomon-Perzyński A, Salomon-Perzyńska M, Michalski B, Skrzypulec-Plinta V (2017)  
300 High-grade serous ovarian cancer: the clone wars. Arch Gynecol Obstet 295:569–576.
- 301 [3] Lindsey A. Torre, MSPH, et al. Ovarian Cancer Statistics, 2018. CA Cancer J Clin. 2018 July;  
302 68(4): 284–296.
- 303 [4] National Comprehensive Cancer Network. NCCN clinical practice guidelines in oncology.  
304 [https://www.nccn.org/professionals/physician\\_gls/f\\_guidelines.asp#site](https://www.nccn.org/professionals/physician_gls/f_guidelines.asp#site). Accessed 19 Jan 2017.
- 305 [5] Bryan Oronsky Carolyn M. Ray Alexander I. Spira. A brief review of the management of  
306 platinum-resistant–platinum-refractory ovarian cancer. Med Oncol (2017) 34:103.
- 307 [6] Chien J and Poole EM: Ovarian cancer prevention, screening and early detection: Report  
308 from the 11th biennial ovarian cancer research symposium. Int J Gynecol Cancer 27 (9S Suppl  
309 5):S20-S22, 2017.
- 310 [7] Choi JY, Lee S, Yun SM, et al: Active hexose correlated compound (AHCC) inhibits the  
311 proliferation of ovarian cancer cells by suppressing signal transducer and activator of  
312 transcription 3 (STAT3) activation. Nutr Cancer 70: 109-115, 2018.
- 313 [8] Dressman HK, Berchuck A, Chan G, et al. An integrated genomic-based approach to  
314 individualized treatment of patients with advanced-stage ovarian cancer. J Clin Oncol. 2007;  
315 25:517–25.

- 316 [9] Jazaeri AA, Awtrey CS, Chandramouli GV, et al. Gene expression profiles associated with  
317 response to chemotherapy in epithelial ovarian cancers. *Clin Cancer Res.* 2005; 11:6300–10.
- 318 [10] Sudo T. Molecular-targeted therapies for ovarian cancer: prospects for the future. *Int J Clin*  
319 *Oncol* 2012; 17: 424-429.
- 320 [11] Sueblinvong T, Ghebre R, Iizuka Y, et al. Establishment, characterization and downstream  
321 application of primary ovarian cancer cells derived from solid tumors. *PLOS One* 2012; 7:  
322 e50519.
- 323 [12] Coleman RL, Monk BJ, Sood AK, et al. Latest research and treatment of advanced-stage  
324 epithelial ovarian cancer. *Nat Rev Clin Oncol* 2013;10:211–24.
- 325 [13] Yu Y, Gaillard S, Phillip JM, et al. Inhibition of spleen tyrosine kinase potentiates  
326 paclitaxel-induced cytotoxicity in ovarian cancer cells by stabilizing microtubules. *Cancer*  
327 *Cell*2015;28:82–96.
- 328 [14] McGrail DJ, Khambhati NN, Qi MX, et al. Alterations in ovarian cancer cell adhesion drive  
329 taxol resistance by increasing microtubule dynamics in a FAK-dependent manner. *Sci*  
330 *Rep*2015;5:9529.
- 331 [15] Kurman RJ, Shih Ie M. The dualistic model of ovarian carcinogenesis: revisited, revised, and  
332 expanded. *Am J Pathol* 2016;186:733–47.
- 333 [16] Jinhua Zhou, Albandri Alfraidi, Shu Zhang, A Novel Compound ARN-3236 Inhibits Salt-  
334 Inducible Kinase 2 and Sensitizes Ovarian Cancer Cell Lines and Xenografts to Paclitaxel. *Clin*  
335 *Cancer Res.* 2017 Apr 15;23(8):1945-1954.



- 336 [17] Li Lin, Brian Hutzen, Pui-Kai Li. et al. A Novel Small Molecule, LLL12, Inhibits STAT3  
337 Phosphorylation and Exhibits Potent Growth-Suppressive Activity in Human  
338 Cancer Cells. *Neoplasia*. 2010 Jan; 12(1): 39–50.
- 339 [18] W.J. Sheng, H. Jiang, D.L. Wun et al. Early responses of the STAT3 pathway to platinum  
340 drugs are associated with cisplatin resistance in epithelial ovarian cancer. *Braz J Med Biol Res*.  
341 2013 Aug; 46(8): 650–658.
- 342 [19] Chou TC: Theoretical basis, experimental design, and computerized simulation of  
343 synergism and antagonism in drug combination studies. *Pharmacol Rev* 58: 621-681, 2006.
- 344 [20] Fu S, Chen X, Lin HJ, et al: Inhibition of interleukin 8/CXC chemokine receptor 1/2  
345 signaling reduces malignant features in human pancreatic cancer cells. *Int J Oncol* 53: 349-357,  
346 2018.
- 347 [21] Chloe F. A. Warren, Michelle W. Wong-Brown, et al. BCL-2 family isoforms in apoptosis  
348 and cancer. *Cell Death and Disease* (2019) 10:177
- 349 [22] Donald M. Miller, Shelia D. Thomas, et al. c-Myc and Cancer Metabolism *Clin Cancer Res*.  
350 2012 October 15; 18(20): 5546–5553.
- 351 [23] John P Alao. The regulation of cyclin D1 degradation: roles in cancer development and the  
352 potential for therapeutic invention *Molecular Cancer* 2007, 6:24.
- 353 [24] Bernard A, Chevrier S, Beltjens F, et al. Cleaved Caspase-3 transcriptionally regulates  
354 angiogenesis promoting chemotherapy resistance. *Cancer Res*. 2019 Oct 14.
- 355 [25] Nicolaas A P Franken, Hans M Rodermond, Jan Stap et al. Clonogenic assay of cells in  
356 vitro. *Nat Protoc*. 2006;1(5):2315-9.

- 357 [26] Shaloam Dasari and Paul Bernard Tchounwou. Cisplatin in cancer therapy: molecular  
358 mechanisms of action. *Eur J Pharmacol.* 2014; 0: 364–378.
- 359 [27] NCCN guidelines version 01.2020: ovarian, fallopian tube, primary peritoneal cancers.
- 360 [28] Moli Wu, Danyang Song, Hui Li. et al. Negative regulators of STAT3 signaling pathway in  
361 cancers. *Cancer Manag Res.* 2019; 11: 4957–4969.
- 362 [29] Guanizo AC, Fernando CD, Garama DJ, et al. STAT3: a multifaceted oncoprotein. *Growth*  
363 *Factors.* 2018 Apr;36(1-2):1-14.
- 364 [30] Buettner R, Mora LB, and Jove R . Activated STAT signaling in human tumors provides  
365 novel molecular targets for therapeutic intervention. *Clin Cancer Res* 8,945-954.
- 366 [31] Turkson J and Jove R. STAT proteins: novel molecular targets for cancer drug discovery.  
367 *Oncogene* 19, 6613-6626.
- 368 [32] Duan Z, Foster R, Bell DA, et al. Signal transducers and activators of transcription 3  
369 pathway activation in drug-resistant ovarian cancer. *Clin Cancer Res* 2006; 12: 5055-5063.
- 370 [33] Silver DL, Naora H, Liu J, et al. Activated signal transducer and activator of transcription  
371 (STAT) 3: localization in focal adhesions and function in ovarian cancer cell motility. *Cancer*  
372 *Res* 2004; 64: 3550-3558.
- 373 [34] Rosen DG, Mercado-Uribe I, Yang G, et al. The role of constitutively active signal  
374 transducer and activator of transcription 3 in ovarian tumorigenesis and prognosis. *Cancer* 2006;  
375 107: 2730-2740.

- 376 [35] Yue P, Zhang X, Paladino D, et al. Hyperactive EGF receptor, Jaks and Stat3 signaling  
377 promote enhanced colony-forming ability, motility and migration of cisplatin-resistant ovarian  
378 cancer cells. *Oncogene* 2012; 31: 2309-2322.
- 379 [36] Kandala PK, Srivastava SK. Diindolylmethane suppresses ovarian cancer growth and  
380 potentiates the effect of cisplatin in tumor mouse model by targeting signal transducer and  
381 activator of transcription 3 (STAT3). *BMC Med* 2012; 10: 9.
- 382 [37] Colomiere M, Findlay J, Ackland L, et al. Epidermal growth factor-induced ovarian  
383 carcinoma cell migration is associated with JAK2/STAT3 signals and changes in the abundance  
384 and localization of alpha6beta1 integrin. *Int J Biochem Cell Biol* 2009; 41: 1034-1045.
- 385 [38] Melinda Huang, Carmen Page, B.A., R. Kevin Reynolds, and Jiayuh Lin. Constitutive  
386 Activation of Stat 3 Oncogene Product in Human Ovarian Carcinoma Cells. *Gynecologic*  
387 *Oncology* 79, 67–73 (2000).
- 388 [39] Turkson J, Ryan D, Kim JS, et al. Phosphotyrosyl peptides block Stat3-mediated DNA  
389 binding activity, gene regulation, and cell transformation. *J Biol Chem* 276, 45443-45455.
- 390 [40] Burke TR Jr, Yao ZJ, Liu DG, et al. Phosphoryltyrosyl mimetics in the design of peptide-  
391 based signal transduction inhibitors. *Biopolymers* 60, 32-44.
- 392 [41] Iwamaru A, Szymanski S, Iwado E, et al. A novel inhibitor of the STAT3 pathway induces  
393 apoptosis in malignant glioma cells both in vitro and in vivo. *Oncogene* 26, 2435-2444.
- 394 [42] Siddiquee K, Zhang S, Guida WC et al. Selective chemical probe inhibitor of Stat3,  
395 identified through structure-based virtual screening, induces antitumor activity. *Proc Natl Acad*  
396 *Sci USA* 104, 7391-7396.

397 [43] Xiao H, Bid HK, Jou D, et al. A novel small molecular STAT3 inhibitor, LY5, inhibits cell  
398 viability, cell migration, and angiogenesis in medulloblastoma cells. *J Biol Chem*. 2015 Feb  
399 6;290(6):3418-29.

400 [44] Wu X, Xiao H, Wang R, et al. Persistent GP130/STAT3 Signaling Contributes to the  
401 Resistance of Doxorubicin, Cisplatin, and MEK Inhibitor in Human Rhabdomyosarcoma  
402 Cells. *Curr Cancer Drug Targets*. 2016;16(7):631-8.

403 [45] Couto JI, Bear MD, Lin J, et al. Biologic activity of the novel small molecule STAT3  
404 inhibitor LLL12 against canine osteosarcoma cell lines. *BMC Vet Res*. 2012 Dec 17;8: 244.

405 [46] Onimoe GI, Liu A, Lin L, et al. Small molecules, LLL12 and FLLL32, inhibit STAT3 and  
406 exhibit potent growth suppressive activity in osteosarcoma cells and tumor growth in mice.  
407 *Invest New Drugs*. 2012 Jun;30(3):916-26.

408

409

410

411

412

413

414

415

416

417

418

419 **Figure legends**

420 **Figure 1.** The chemical structure of LLL12B.

421

422 **Figure 2.** LLL12B inhibits p-STAT3 and its downstream targets in human ovarian cancer cells.

423 **A-D** The effects of LLL12B on STAT3 phosphorylation (Tyr705) and its downstream targets in  
424 ovarian cancer cell lines. A2780, CAOV3, SKOV3, OVCAR5 cells were treated with DMSO or  
425 different concentrations of LLL12B. The levels of p-STAT3 and the downstream target gene  
426 proteins were determined by Western blots.

427 **Figure 3.** The effects of LLL12B, cisplatin, paclitaxel, and drug combination on cell viability.

428 MTT assays were performed to evaluate cell viability. **A-D** LLL12B inhibited cell viability of  
429 ovarian cancer cells, which were synergistically inhibited when LLL12B was combined with  
430 cisplatin or paclitaxel. The differences were found to be significantly different at \* $p < 0.05$ ,  
431 \*\* $p < 0.01$ , \*\*\* $p < 0.001$  and \*\*\*\* $p < 0.0001$ .

432 **Figure 4.** The effects of LLL12B, cisplatin, paclitaxel, and drug combination on cell migration.

433 Wound-healing assays were performed to evaluate the migration ability of SKOV3 and A2780  
434 ovarian cancer cells. SKOV3 and A2780 cells were seeded in 6-well plates and treated with  
435 DMSO or different concentration of drugs: LLL12B or cisplatin or paclitaxel or the combination.  
436 The differences were found to be significantly different at \*\*\* $p < 0.001$  and \*\*\*\* $p < 0.0001$ .

437 **Figure 5.** The effects of LLL12B, cisplatin, and drug combination on cancer cell growth. Cell

438 growth assays were performed to evaluate cell proliferation ability of ovarian cancer cells. Cells  
439 were treated with LLL12B, cisplatin and their combination. The differences were found to be  
440 significantly different at \*\* $p < 0.01$  and \*\*\*\* $p < 0.0001$ . LLL12B alone or combined with cisplatin  
441 inhibited cell growth of ovarian cancer cells.

442 **Figure 6.** The effects of LLL12B, paclitaxel, and drug combination on cancer cell growth. Cell  
443 growth assays were performed to evaluate cell proliferation ability of ovarian cancer cells. Cells  
444 were treated with LLL12B, paclitaxel and their combination. The differences were found to be  
445 significantly different at \*\* $p < 0.01$  and \*\*\*\* $p < 0.0001$ . LLL12B alone or combined with  
446 paclitaxel inhibited cell growth of ovarian cancer cells.  
447

**Figure 1**

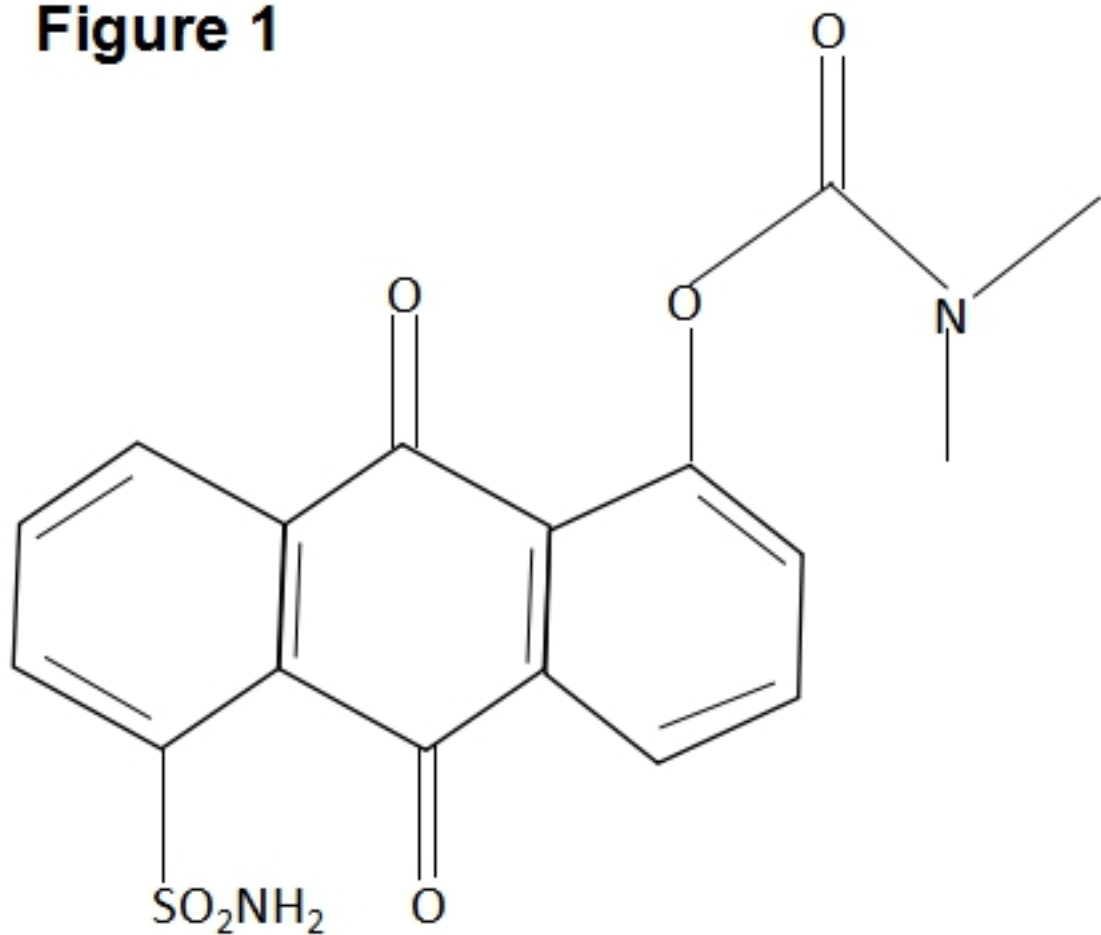

**LLL12B**

Figure 1

Figure 2

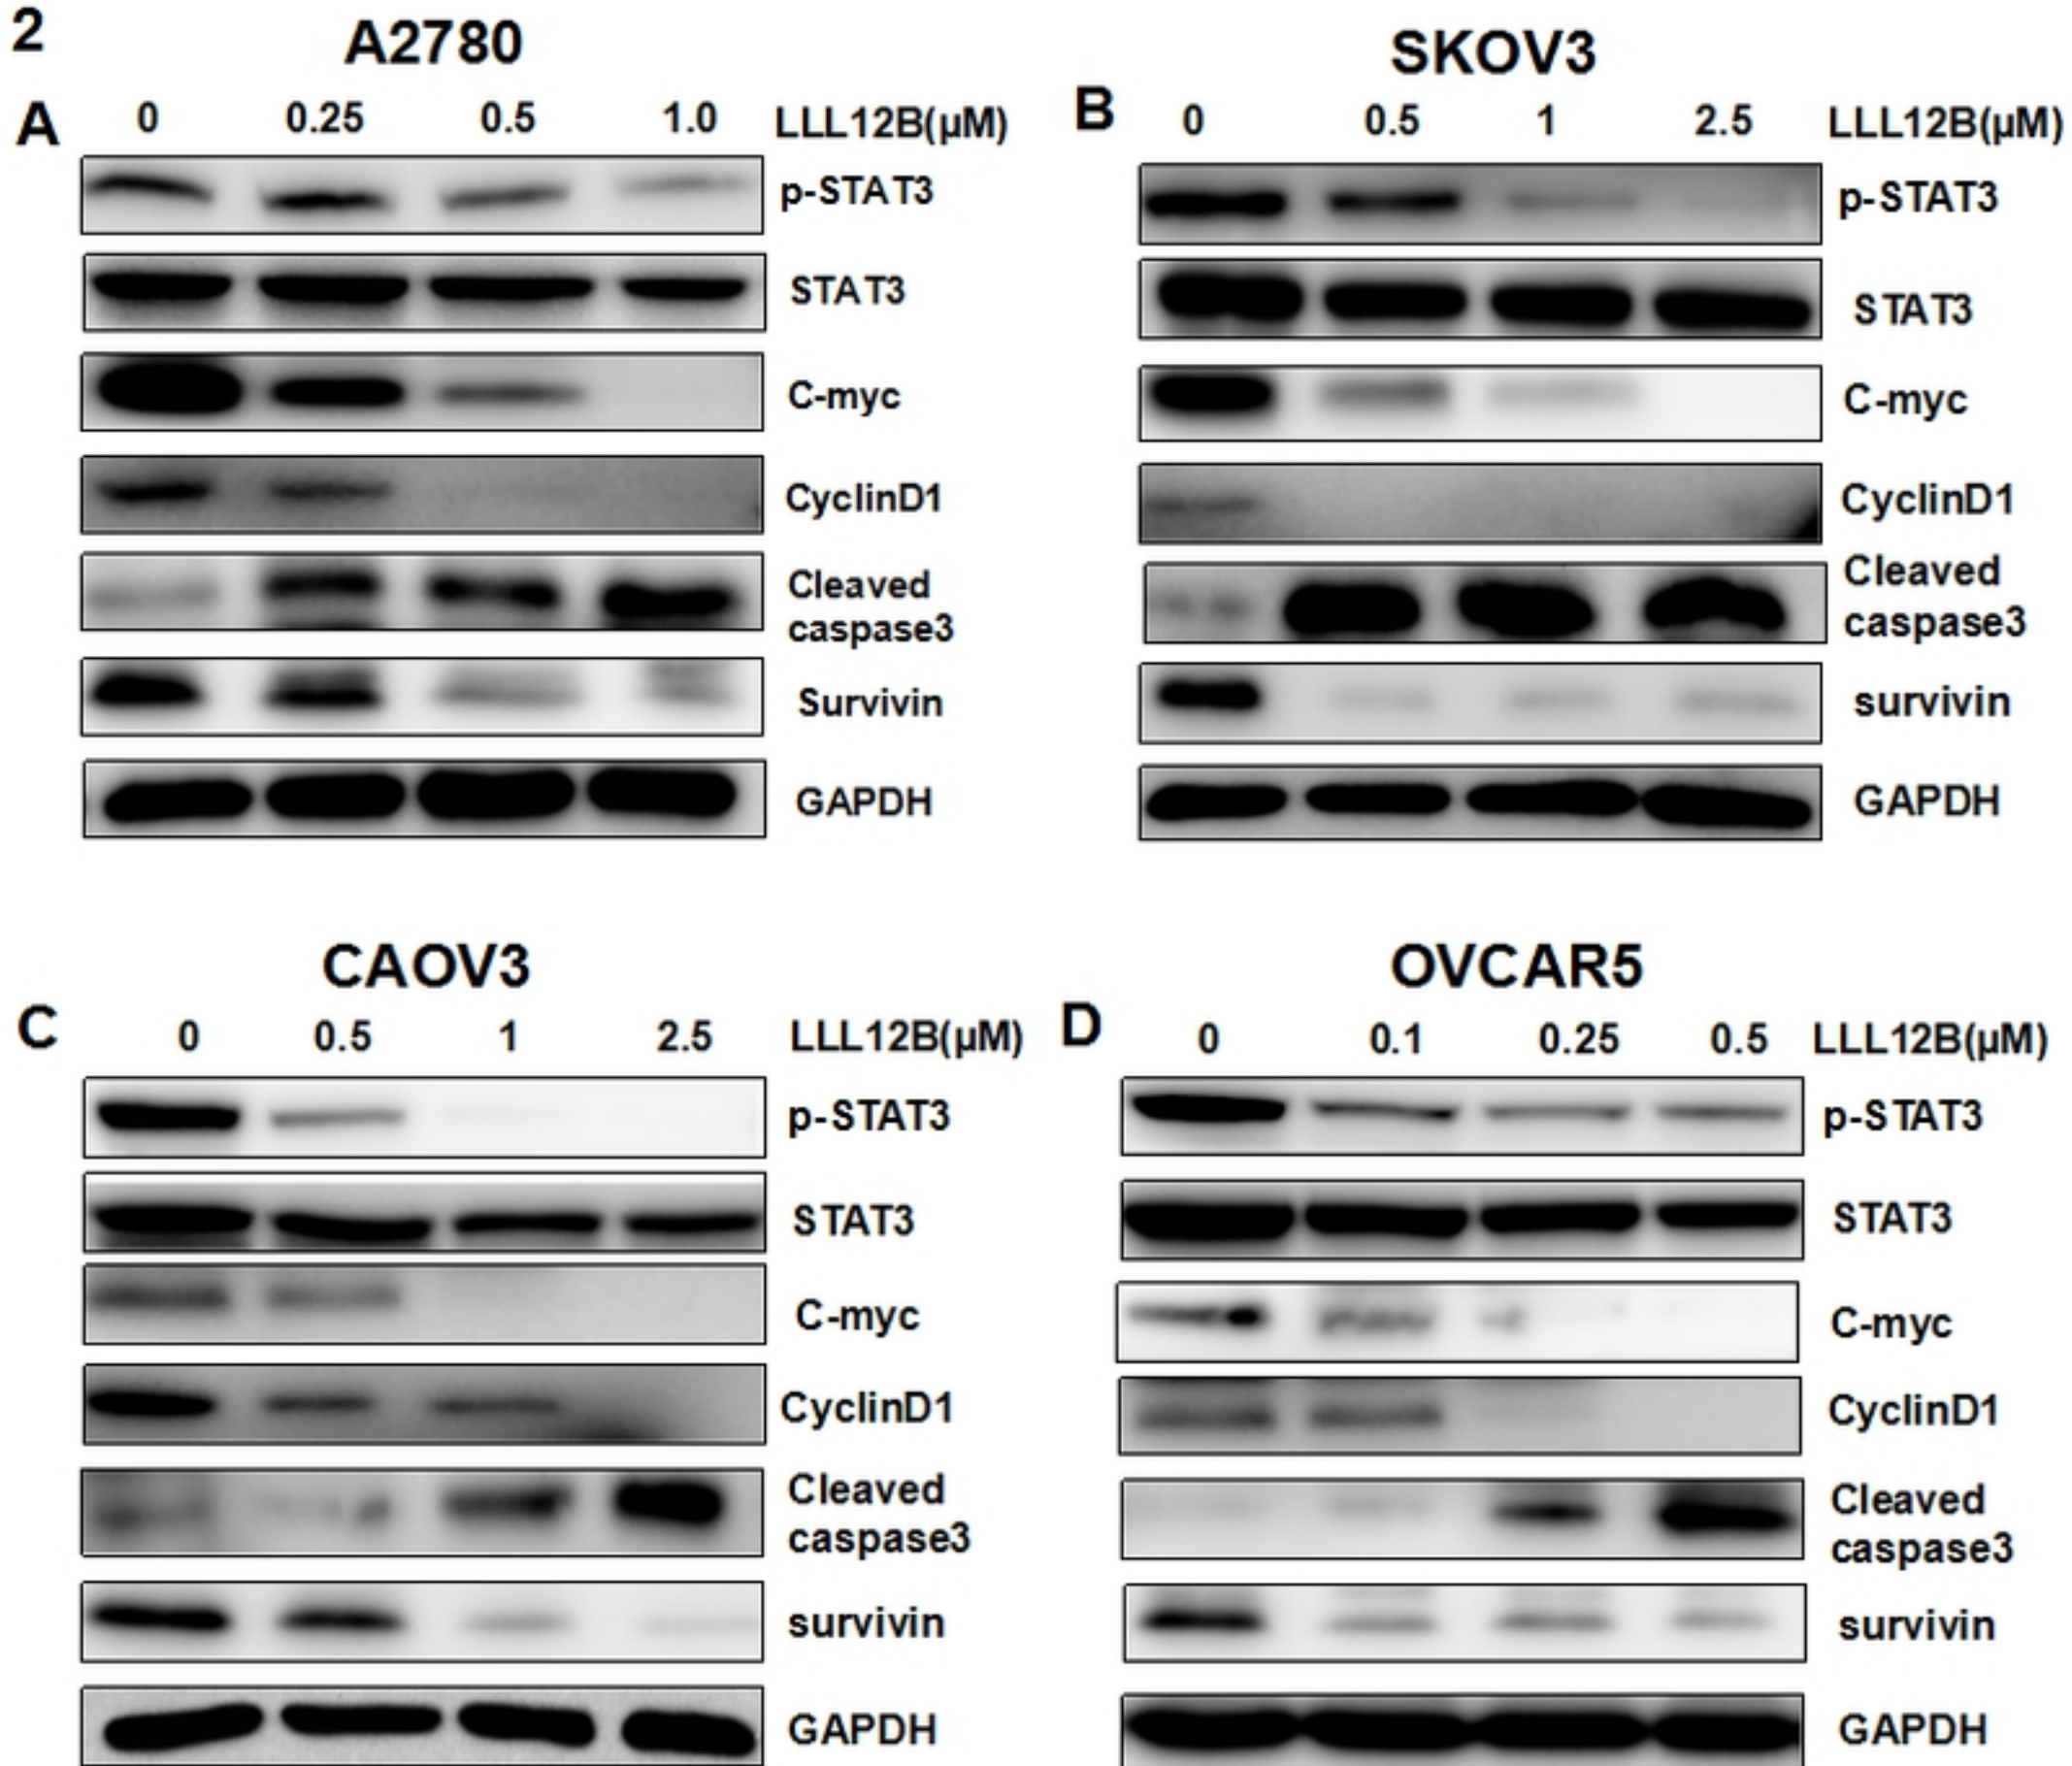

Figure 2



Figure 3

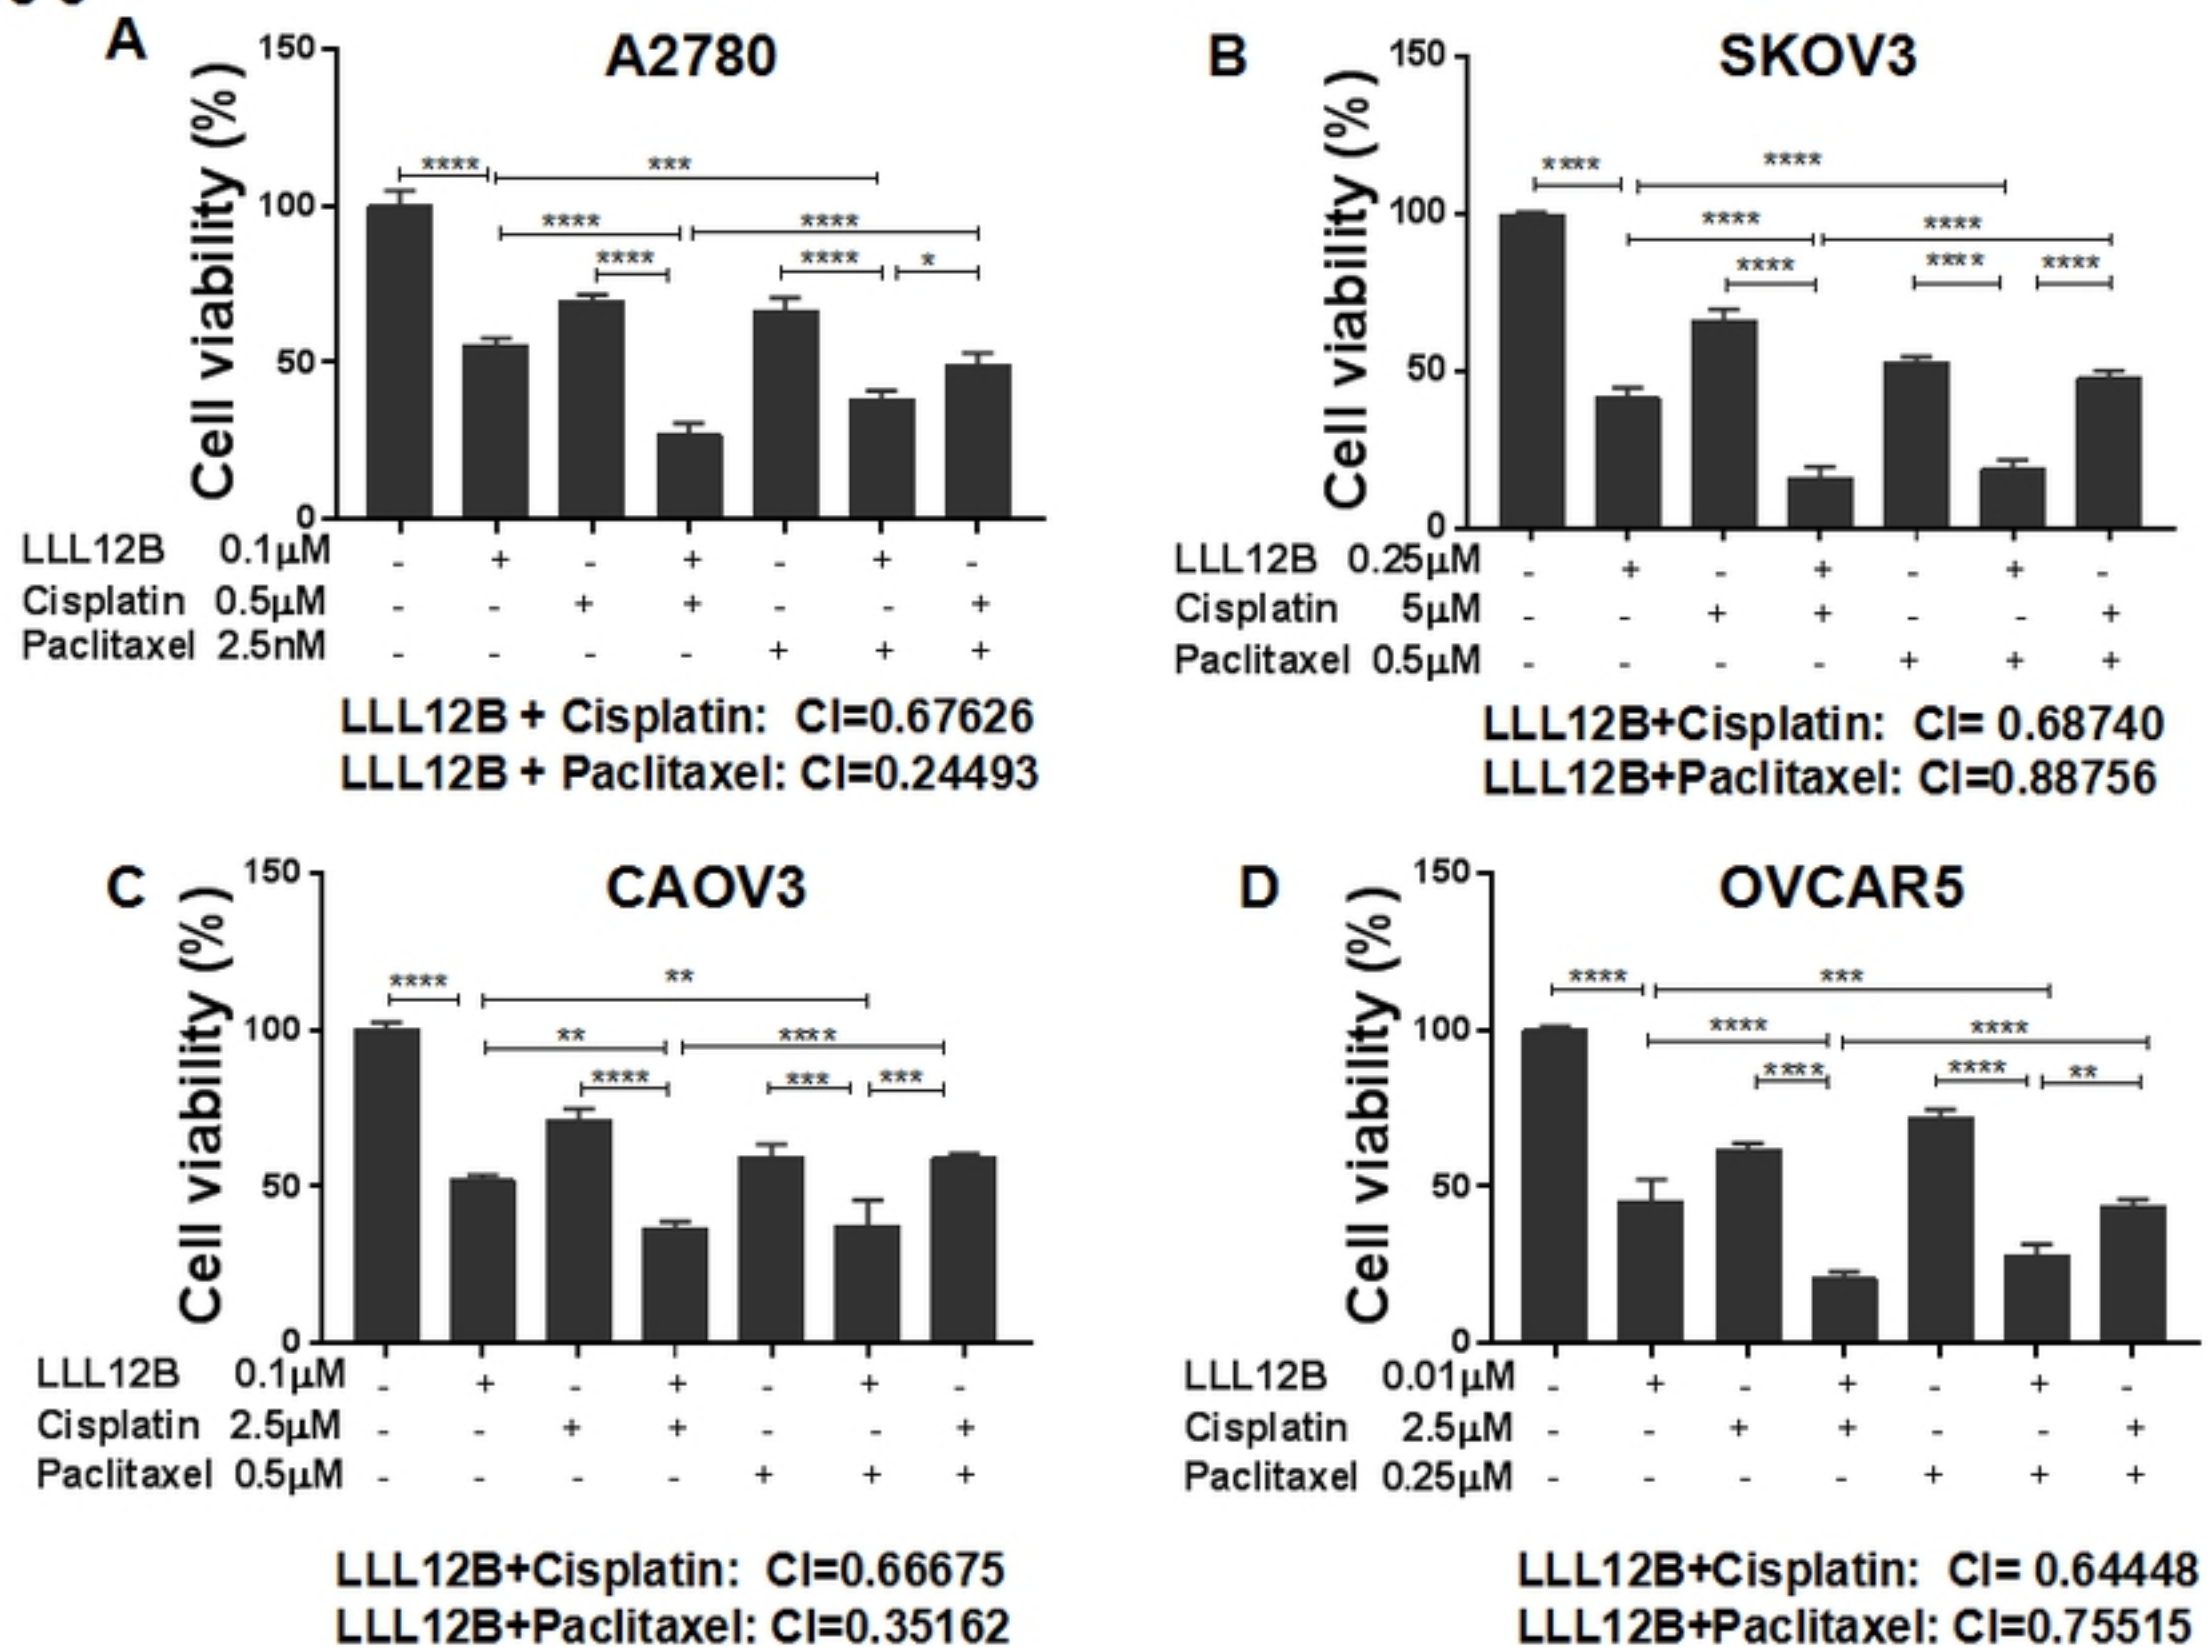

Figure 3

Figure 4

SKOV3

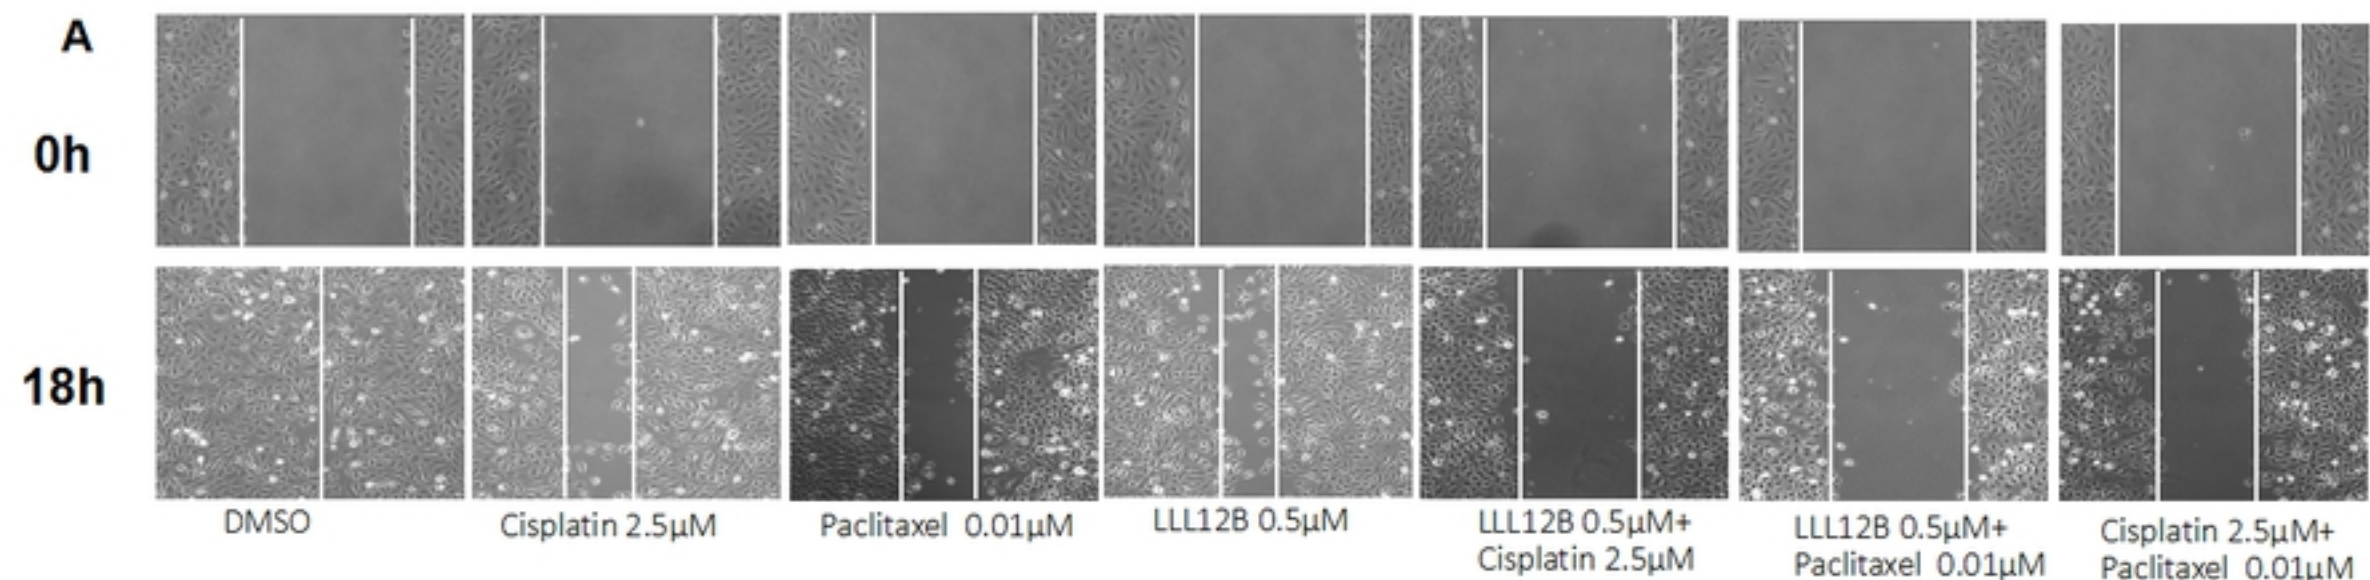

**B**

SKOV3

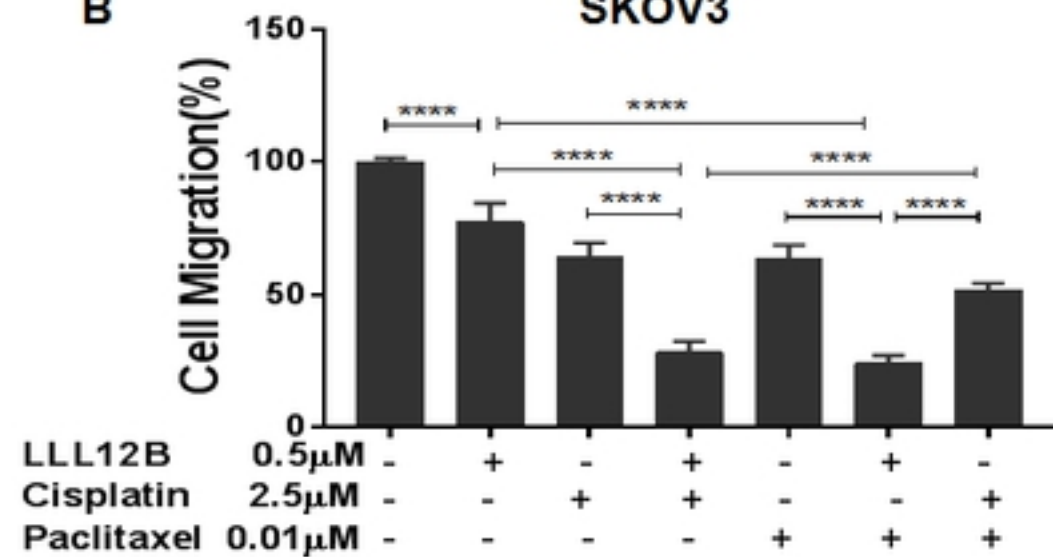

**C**

A2780

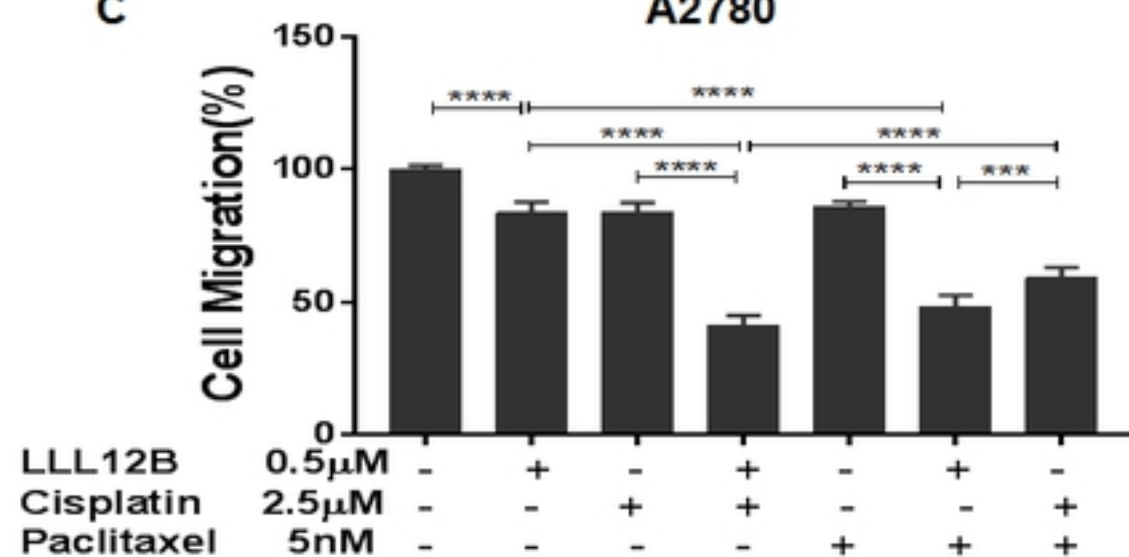

Figure 4

Figure 5

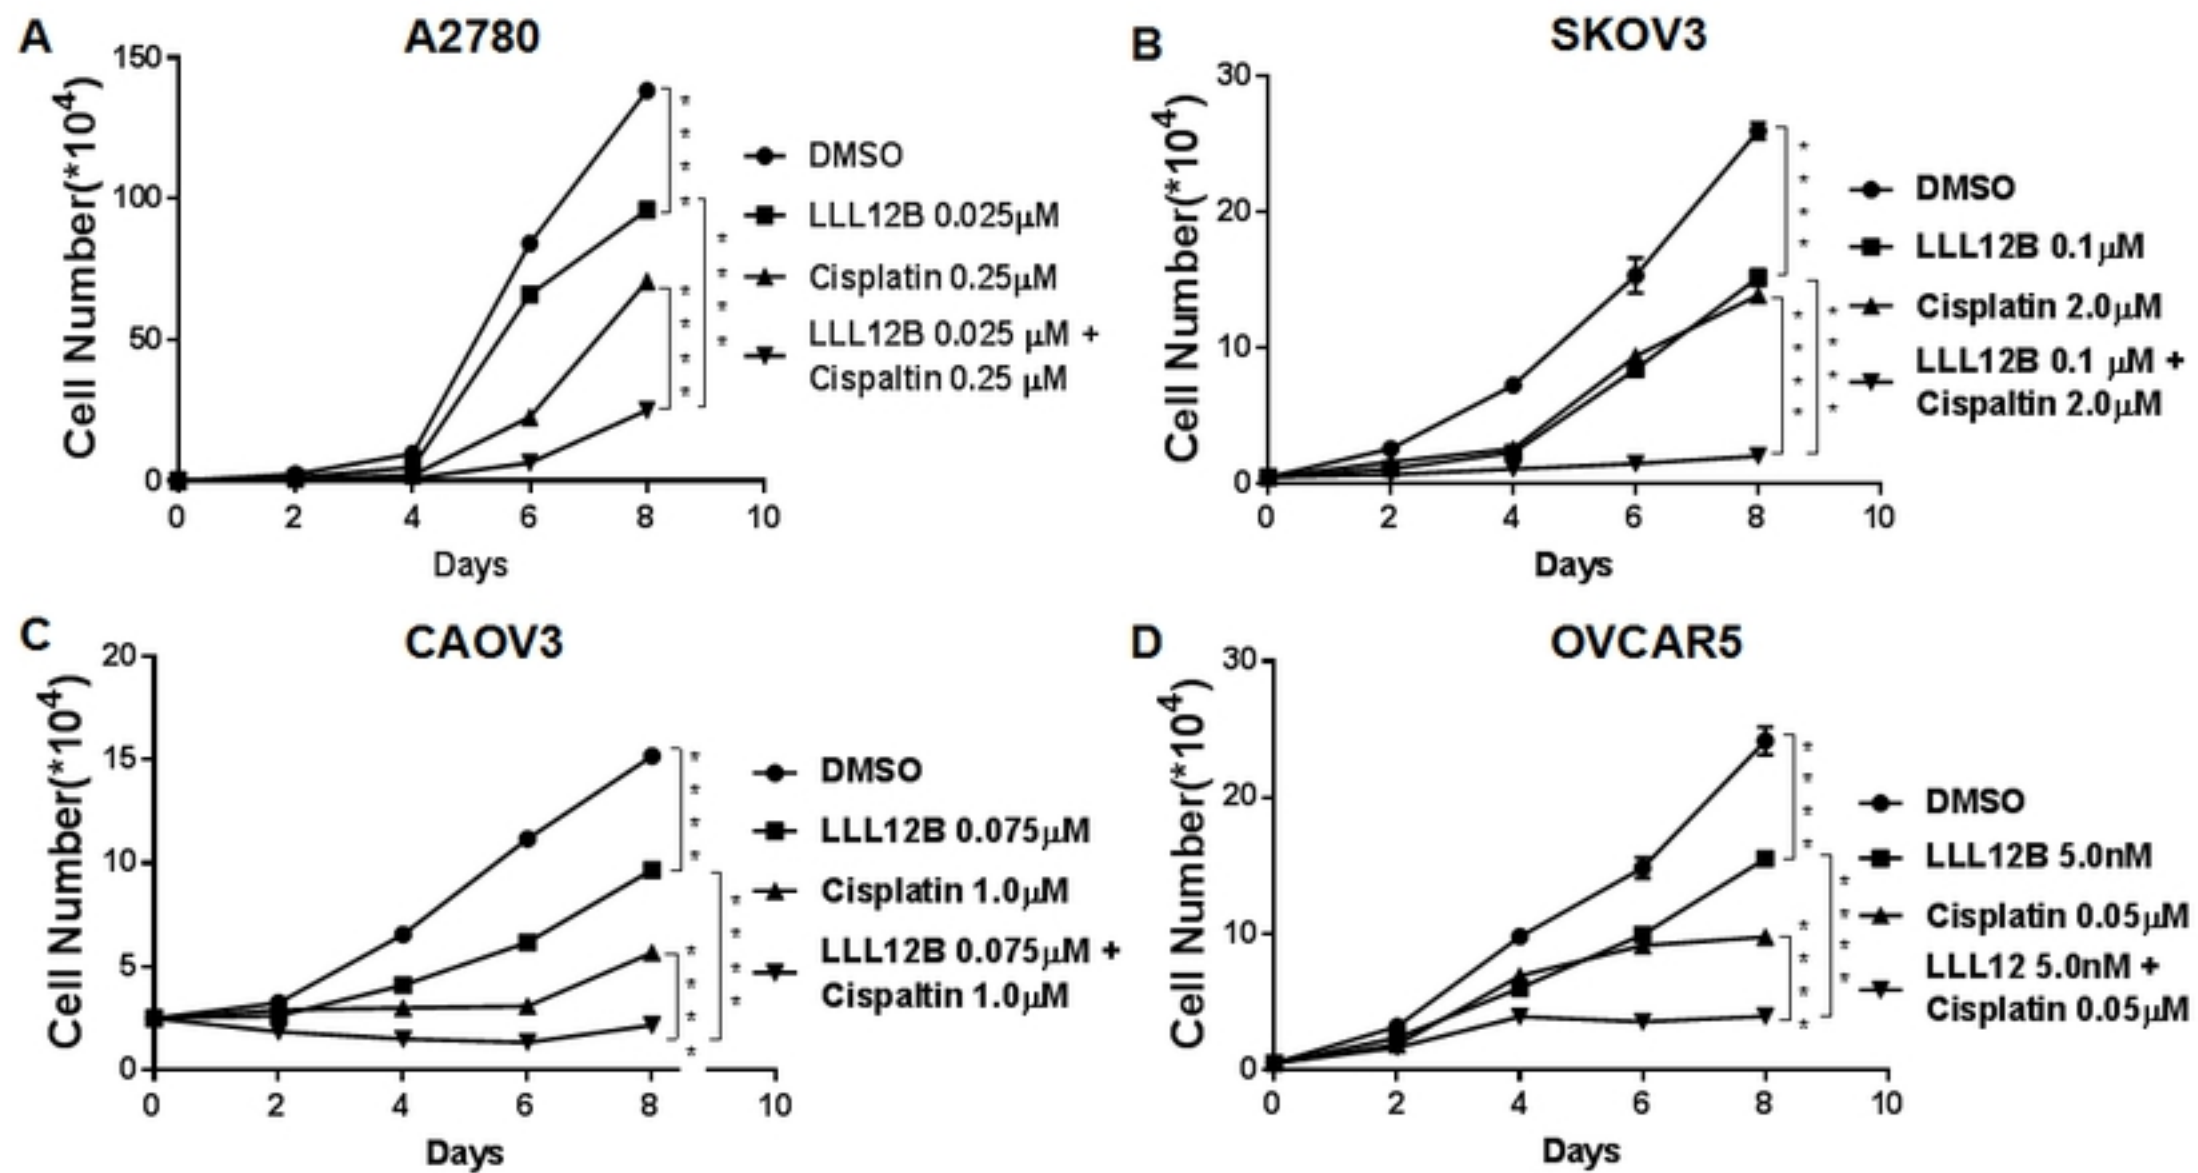

Figure 5

Figure 6

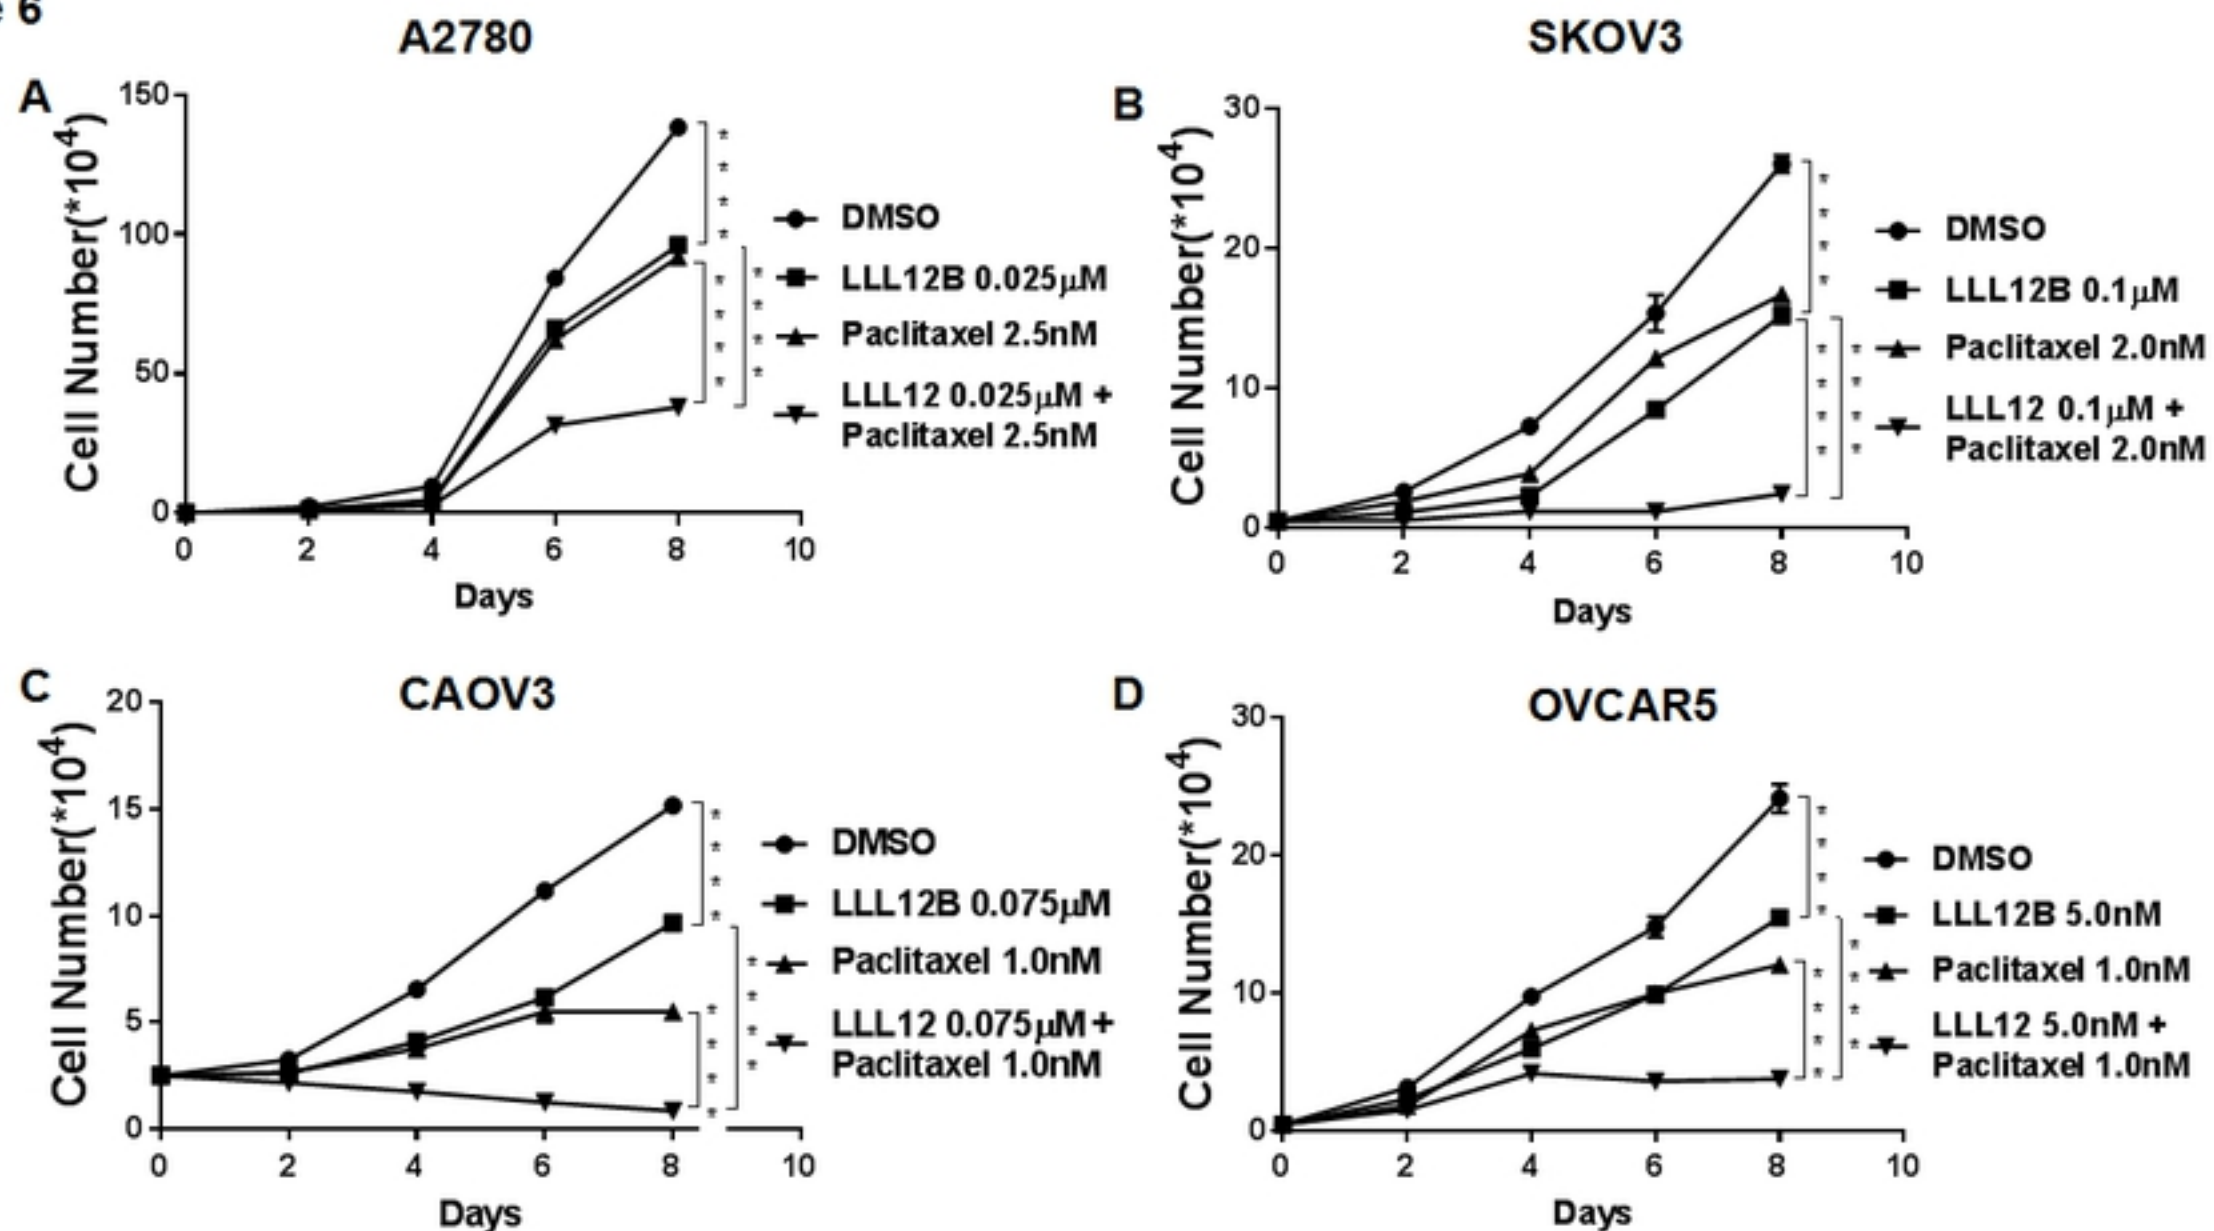

Figure 6
